# Supplementary material for: Genome-based analysis of the type II PKS biosynthesis pathway of xanthones inStreptomyces caelestisand their antifungal activity
Source: Royal Society of Chemistry journal article supplement (doi:10.1039/c9ra07345k), 2019-01-01
Supplement: c9ra07345k1.pdf [file c9ra07345k1.pdf]

Genome-based analysis of the type II PKS biosynthesis pathway of xanthonenes in *Streptomyces caelestis* and their antifungal activity

Ling-Li Liu<sup>a</sup>, Hong-Fei Liu<sup>a</sup>, Hua-Hua Gao<sup>a</sup>, Zheng-Zhong Yang<sup>a</sup>,  
Xiao-Lan Feng<sup>a</sup>, Jin-Ming Gao<sup>a, \*</sup>, Jian-Bang Zhao<sup>b, \*</sup>

<sup>a</sup> Shaanxi Key Laboratory of Natural Products & Chemical Biology, College of Chemistry & Pharmacy, Northwest A&F University, Yangling 712100, Shaanxi, People's Republic of China;

<sup>b</sup> College of Information Engineering, Northwest A&F University, Yangling 712100, Shaanxi, People's Republic of China;

\* co-correspondence: zhaojianbang@nwafu.edu.cn (J.-B.Z.) and jinminggao@nwafu.edu.cn (J.-M.G.)

## Index

|                                                                                                                                                  |    |
|--------------------------------------------------------------------------------------------------------------------------------------------------|----|
| Figure S1. $^1\text{H}$ and $^{13}\text{C}$ NMR spectra of citreamicin $\varepsilon$ (1) in DMSO- $d_6$ .....                                    | 3  |
| Figure S2. HR-ESI-MS spectrum of citreamicin $\varepsilon$ (1). .....                                                                            | 4  |
| Figure S3. $^1\text{H}$ and $^{13}\text{C}$ NMR spectra of Citreamicin $\theta$ (2) in DMSO- $d_6$ .....                                         | 5  |
| Figure S4. HR-ESI-MS spectrum of citreamicin $\theta$ (2).....                                                                                   | 6  |
| Figure S5. UPLC-MS analysis of the intermediates in citreamicins<br>biosynthesis pathway. ....                                                   | 7  |
| Table S1. Gene clusters encoding secondary metabolite biosynthesis in<br>the draft genome sequences of <i>Streptomyces caelestis</i> Aw99c. .... | 8  |
| Table S2. Deduced function of the open reading frames in Figure 5 .....                                                                          | 10 |

Figure S1.  $^1\text{H}$  and  $^{13}\text{C}$  NMR spectra of citreamicin  $\epsilon$  (1) in  $\text{DMSO-}d_6$ .

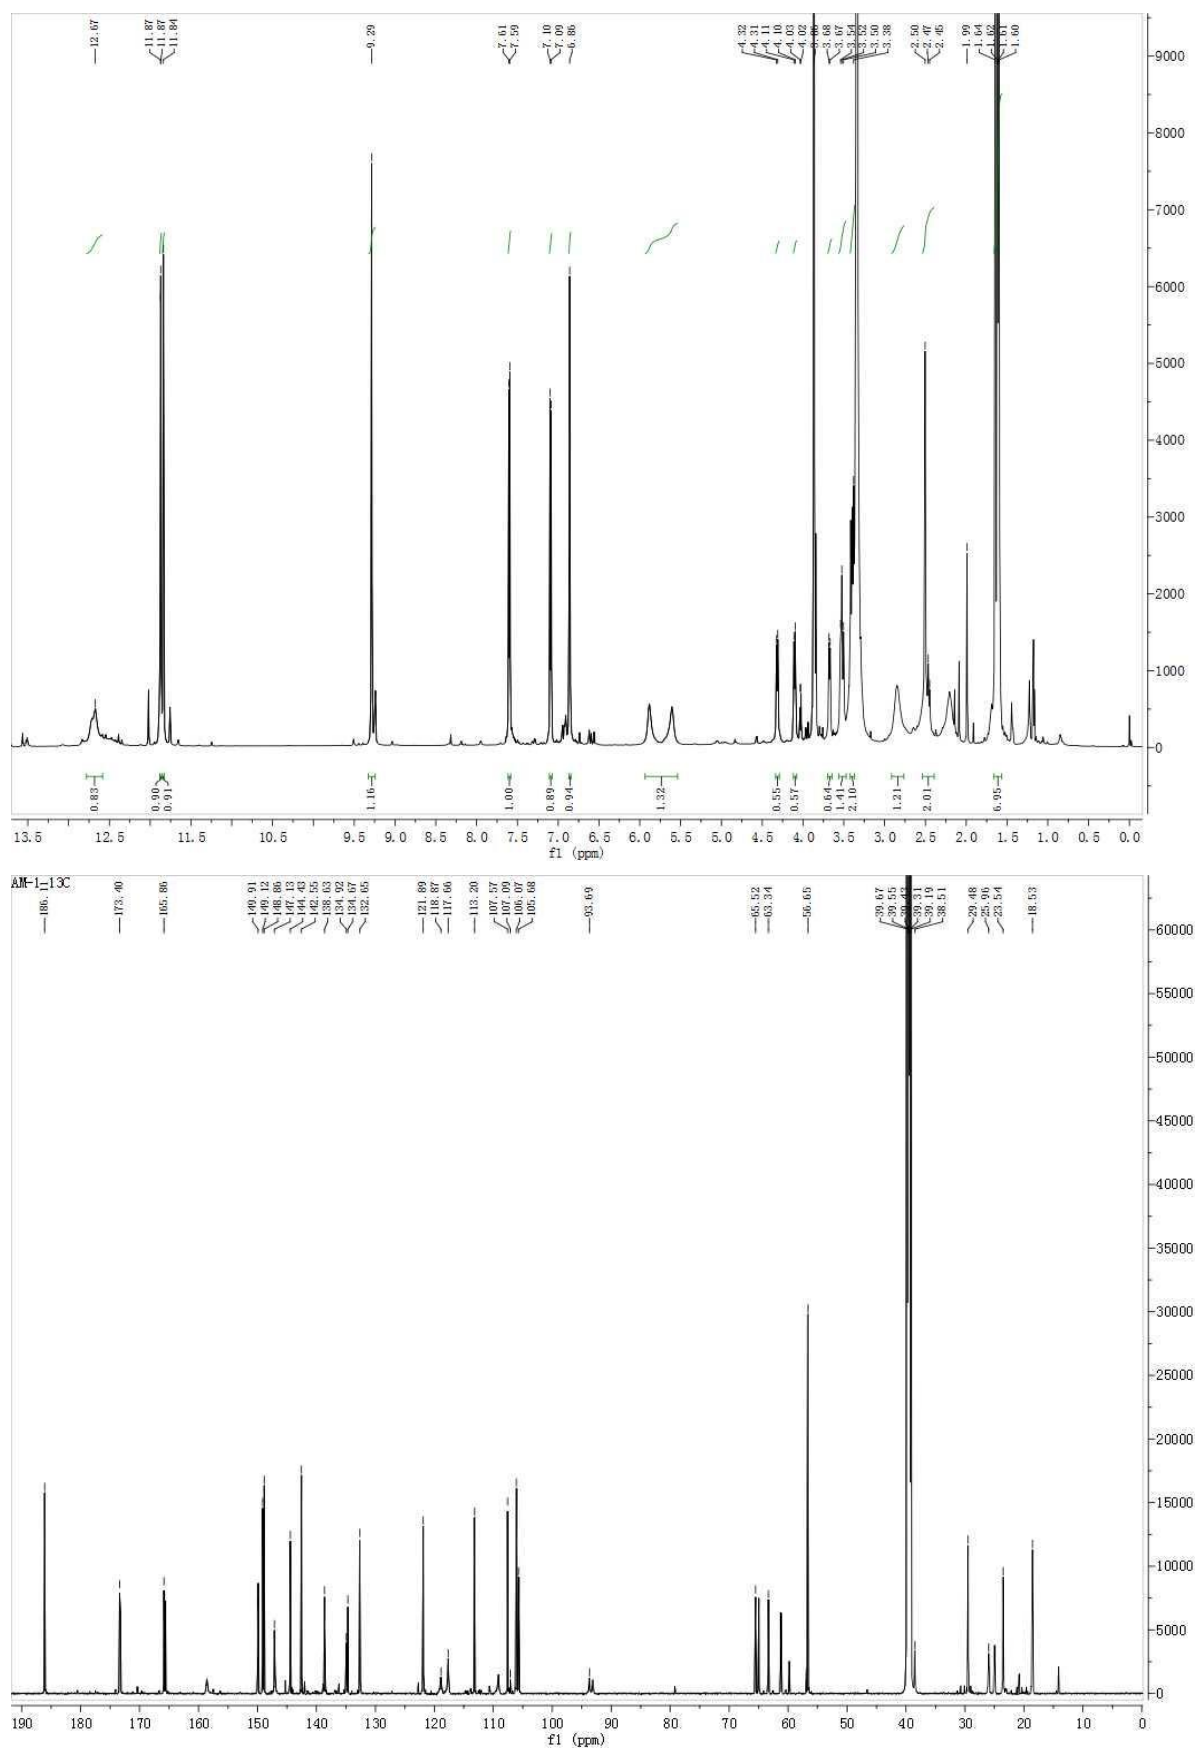

**Figure S2. HR-ESI-MS spectrum of citreamicin  $\epsilon$  (1).**

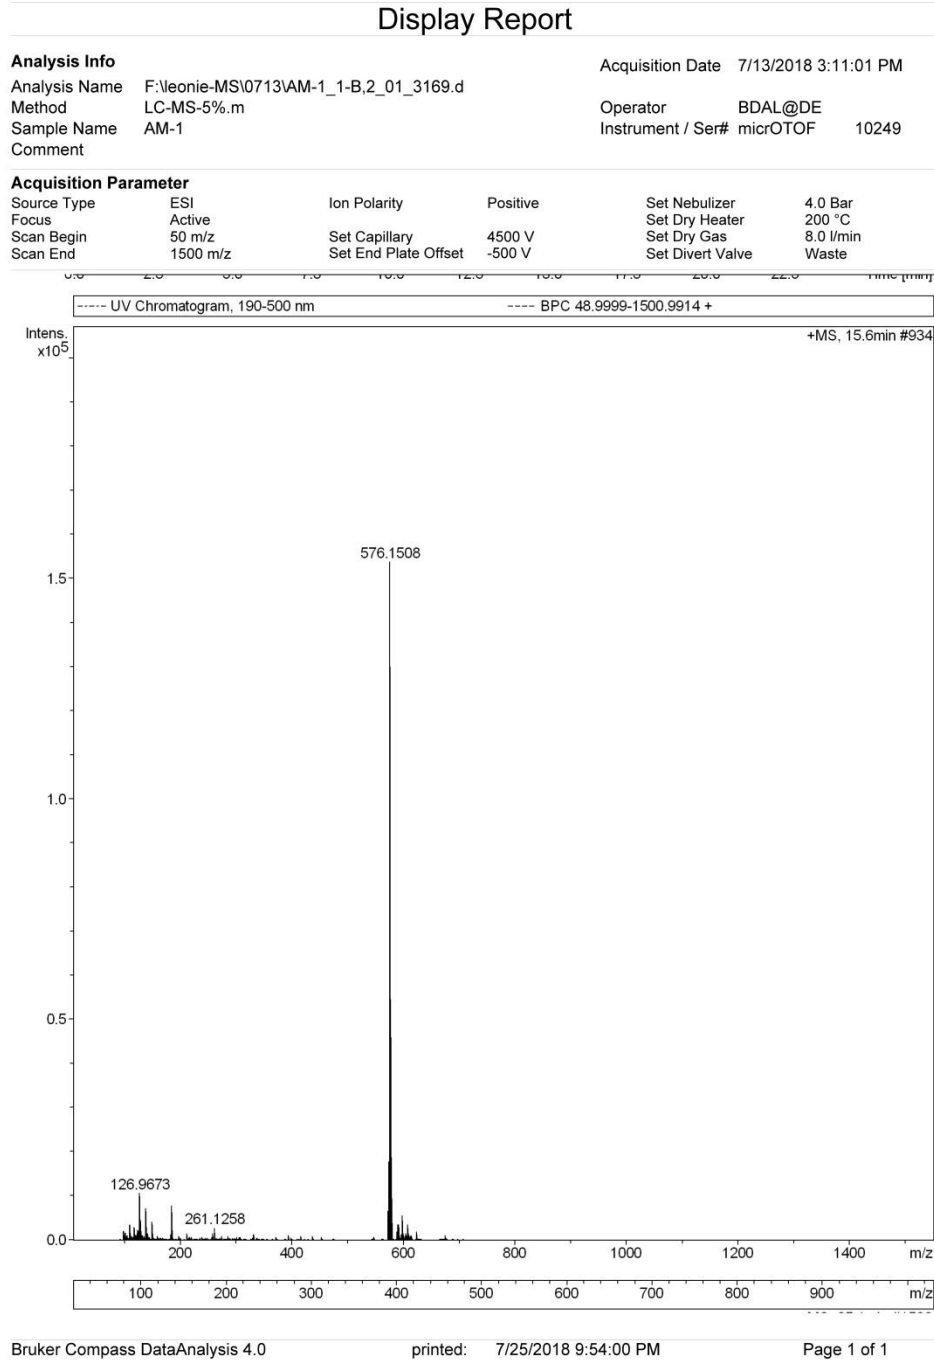

Figure S3.  $^1\text{H}$  and  $^{13}\text{C}$  NMR spectra of Citreamicin  $\theta$  (2) in  $\text{DMSO-}d_6$

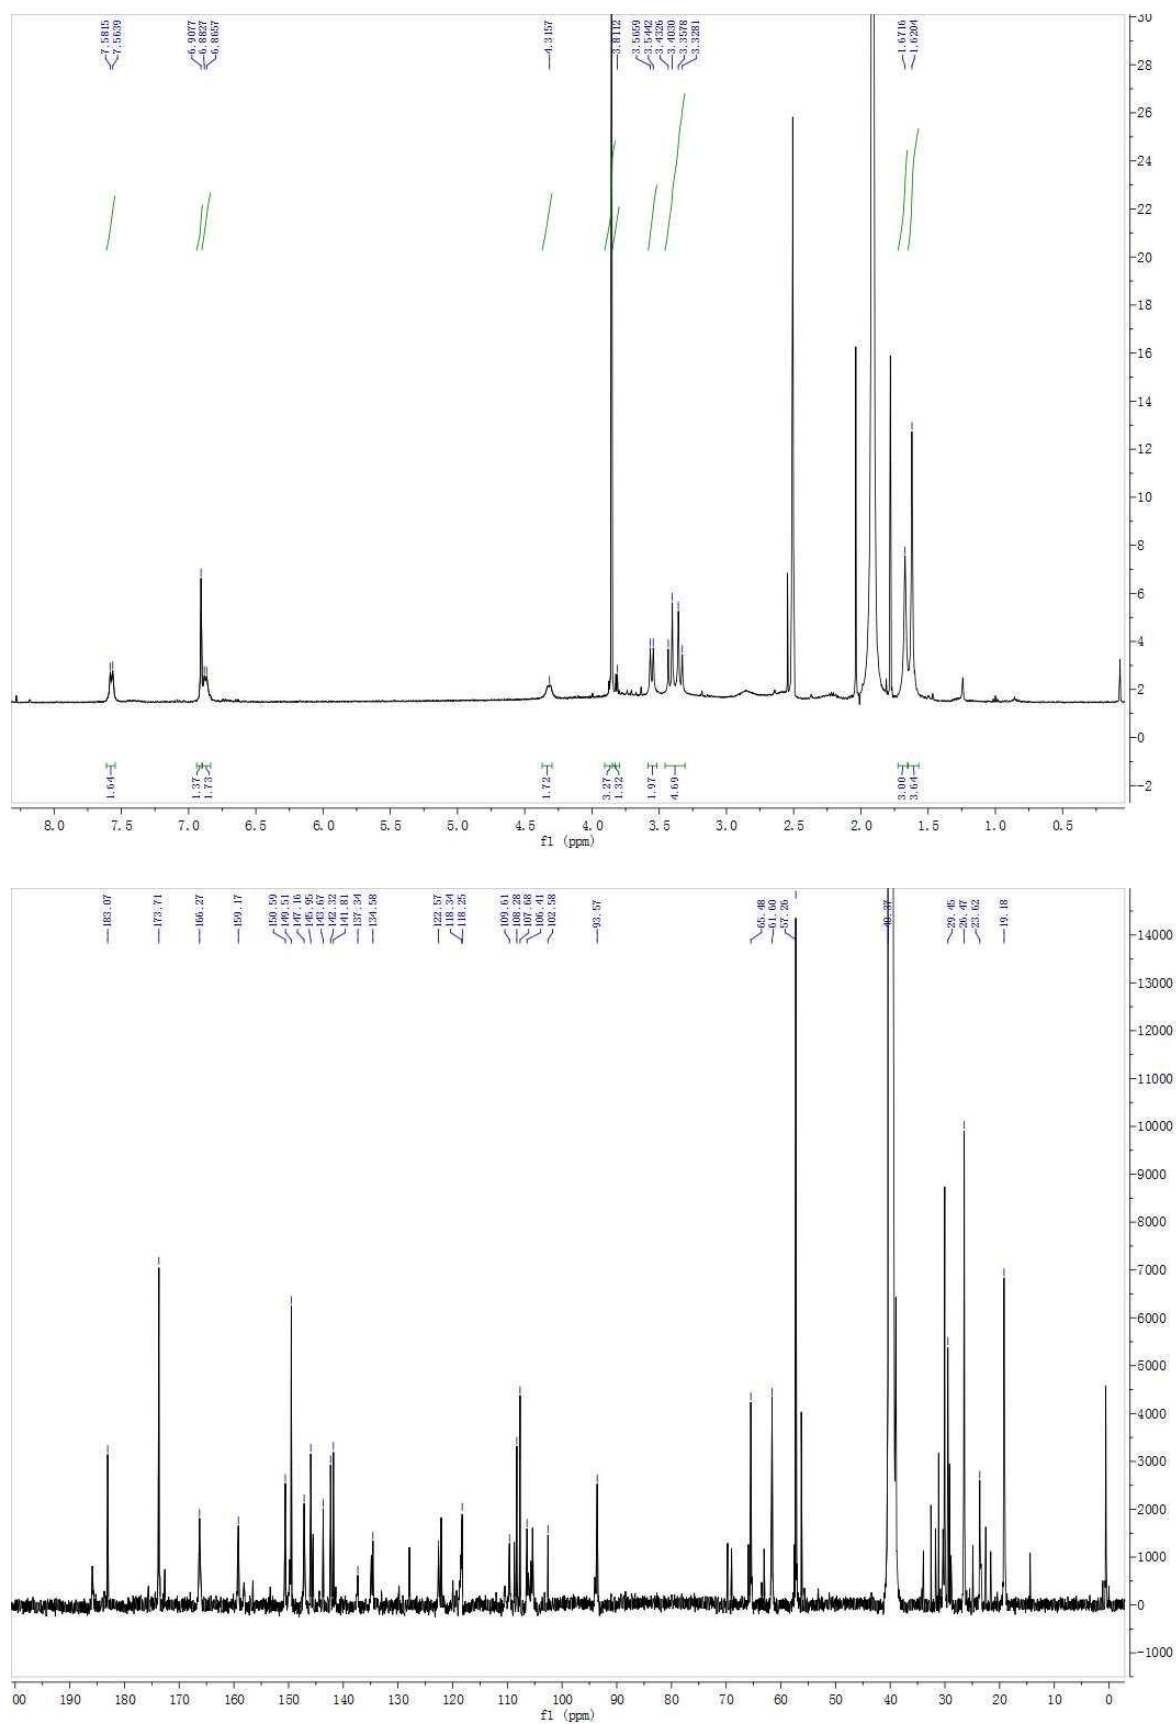

**Figure S4. HR-ESI-MS spectrum of citreamicin  $\theta$  (2).**

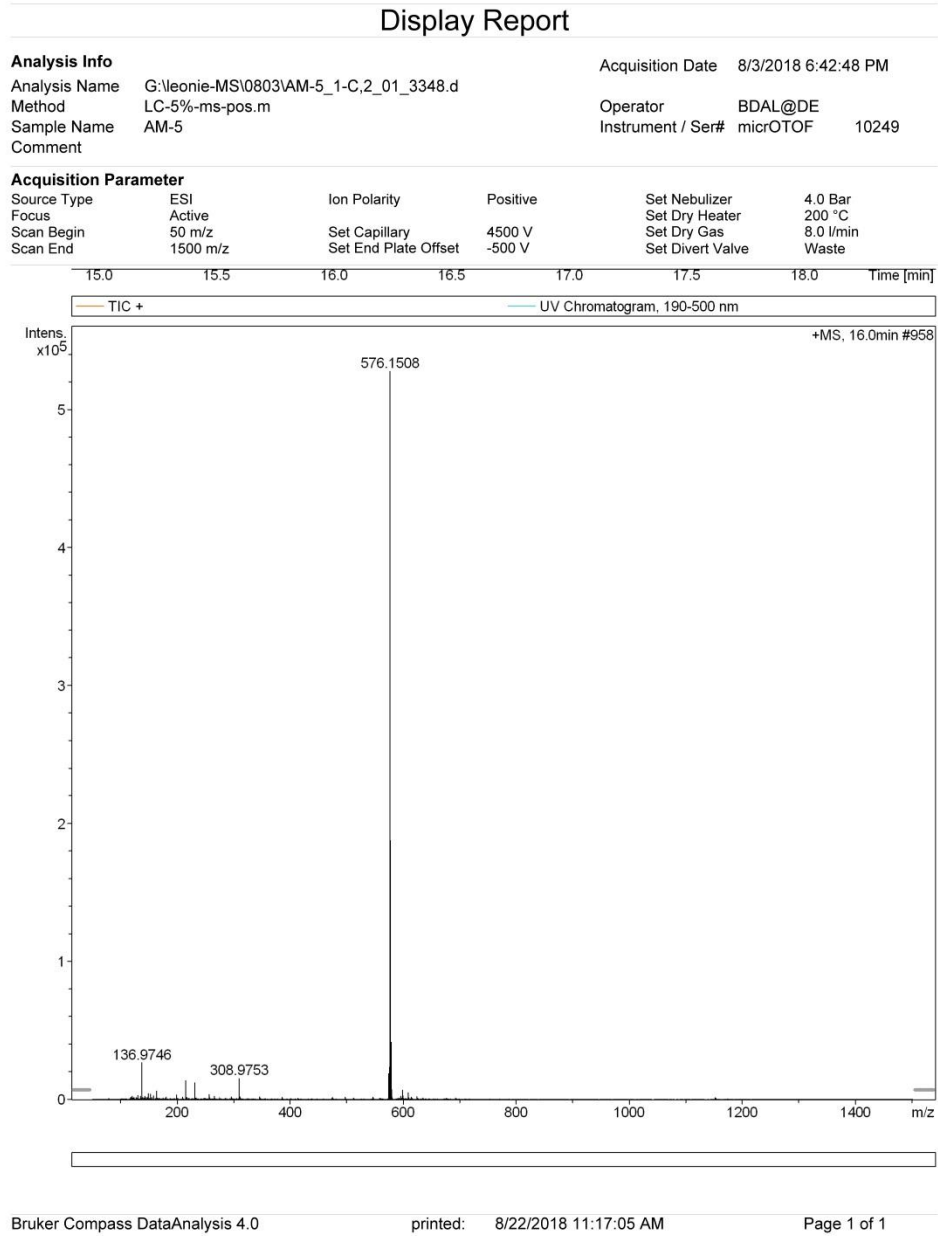

**Figure S5. UPLC-MS analysis of the intermediates in citreamicins biosynthesis pathway.**

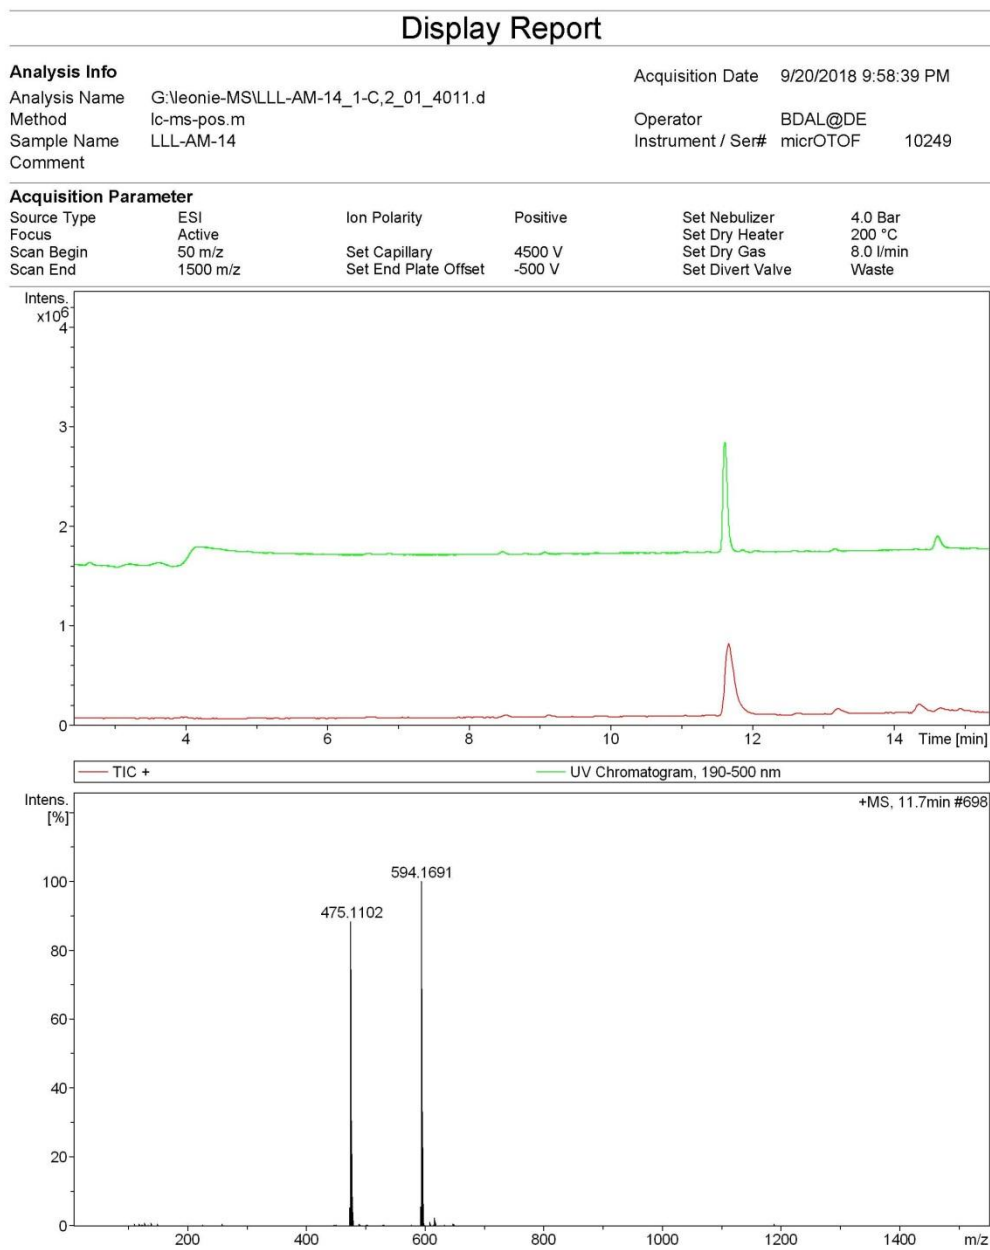

**Table S1. Gene clusters encoding secondary metabolite biosynthesis in the draft genome sequences of *Streptomyces caelestis* Aw99c.**

| Type of secondary metabolite | Most similar known cluster   | Similarity | MIBiG BGC-ID <sup>a</sup> |
|------------------------------|------------------------------|------------|---------------------------|
| Lanthipeptide                | SapB                         | 75%        | BGC0000551                |
| Type II PKS                  | Xantholin                    | 34%        | BGC0000279                |
| Siderophore                  | Desferrioxamine B            | 83%        | BGC0000940                |
| Type III PKS                 | Alkylresorcinol              | 100%       | BGC0000282                |
| Type II PKS                  | Spore pigment                | 83%        | BGC0000271                |
| Linaridin                    | Pentostatine /<br>Vidarabine | 9%         | BGC0001735                |
| Type I PKS                   | Oligomycin                   | 38%        | BGC0000117                |
| <u>Phenazine</u>             | Unknown                      |            |                           |
| Bacteriocin                  | Informatipeptin              | 28%        | BGC0000518                |
| Bacteriocin                  | Unknown                      |            |                           |
| Type I PKS                   | Micromonolactam              | 100%       | BGC0000095                |
| Lanthipeptide                | Unknown                      |            |                           |
| Terpene                      | Geosmin                      | 100%       | BGC0001181                |
| Type I PKS                   | Micromonolactam              | 100%       | BGC0000095                |
| Terpene                      | Isorenieratene               | 100%       | BGC0000664                |
| Terpene                      | Albaflavenone                | 100%       | BGC0000660                |
| Ectoine                      | Ectoine                      | 100%       | BGC0000853                |
| Siderophore                  | Grincamycin                  | 11%        | BGC0000229                |
| NRPS-PKS                     | Antimycin                    | 100%       | BGC0001455                |
| Terpene                      | Carotenoid                   | 54%        | BGC0000633                |
| NRPS                         | Naphthyridinomycin           | 64%        | BGC0000394                |



| Type of secondary metabolite | Most similar known cluster | Similarity | MIBiG BGC-ID <sup>a</sup> |
|------------------------------|----------------------------|------------|---------------------------|
| Terpene                      | Hopene                     | 53%        | BGC0000663                |
| NRPS-PKS                     | PM100117 / PM100118        | 8%         | BGC0001359                |
| Type I PKS                   | Unknown                    |            |                           |
| Type I PKS                   | Micromonolactam            | 100%       | BGC0000095                |
| Type I PKS                   | Unknown                    |            |                           |
| NRPS                         | Unknown                    |            |                           |

<sup>a</sup> MIBiG refers to “Minimum Information about a Biosynthetic Gene cluster” in the antiSMASH 5.0.

**Table S2. Deduced function of the open reading frames in Figure 5**

| gene | Size (AA) | Proposed function                         | Protein homolog                             | Identity/ Similarity(%) | Protein accession |
|------|-----------|-------------------------------------------|---------------------------------------------|-------------------------|-------------------|
| 1    | 205       | Uma2 family endonuclease                  | <i>Streptomyces sp.</i><br>NRRL F-5527      | 98/99                   | WP_031059834      |
| 2    | 285       | AraC family transcriptional regulator     | <i>Streptomyces sp.</i><br>NRRL F-5527      | 99/99                   | WP_031059832      |
| 3    | 309       | putative inner membrane transporter YedA  | <i>Streptomyces sp.</i><br>Go-475           | 86/90                   | AXE85492          |
| 4    | 150       | hypothetical protein                      | <i>Streptomyces pseudogriseolus</i>         | 99/99                   | WP_086682316      |
| 5    | 224       | O-methyltransferase                       | <i>Streptomyces gancidicus</i><br>BKS 13-15 | 96/96                   | EMF30210          |
| 6    | 111       | hypothetical protein                      | <i>Streptomyces roseochromogenus</i>        | 77/86                   | WP_023544435      |
| 7    | 280       | aminoglycoside phosphotransferase         | <i>Streptomyces sp.</i><br>NTK 937          | 80/86                   | WP_037882343      |
| 8    | 645       | ATP-binding protein                       | <i>Streptomyces sp.</i><br>NRRL S-1314      | 99/99                   | WP_031018592      |
| 9    | 153       | Roadblock / LC7 domain-containing protein | <i>Streptomyces sp.</i><br>DH-12            | 94/96                   | WP_106414477      |
| 10   | 119       | DUF742 domain-containing protein          | <i>Streptomyces sp.</i><br>F-7              | 96/98                   | WP_093767843      |
| 11   | 205       | ATP-binding protein                       | <i>Streptomyces sp.</i><br>CNH189           | 99/99                   | WP_024882742      |
| 12   | 426       | cytochrome P450                           | <i>Streptomyces sp.</i><br>F-7              | 89/95                   | WP_093767845      |
| 13   | 408       | cytochrome P450                           | <i>Streptomyces sp.</i><br>F-7              | 97/98                   | WP_093767846      |
| 14   | 71        | DUF397 domain-containing protein          | <i>Streptomyces sp.</i><br>NRRL F-5527      | 97/98                   | WP_031059799      |
| 15   | 97        | ATP-binding protein                       | <i>Streptomyces sp.</i><br>DH-12            | 81/81                   | WP_106416448      |

| <b>gene</b> | <b>Size<br/>(AA)</b> | <b>Proposed function</b>                                                    | <b>Protein homolog</b>                  | <b>Identity/<br/>Similarity(%)</b> | <b>Protein<br/>accession</b> |
|-------------|----------------------|-----------------------------------------------------------------------------|-----------------------------------------|------------------------------------|------------------------------|
| 16          | 90                   | type II toxin-antitoxin<br>system<br>prevent-host-death<br>family antitoxin | <i>Streptomyces sp.</i><br>NRRL F-5527  | 95/95                              | WP_051791764                 |
| 17          | 243                  | hypothetical protein                                                        | <i>Streptomyces sp.</i><br>CNH189       | 96/99                              | WP_024882739                 |
| 18          | 529                  | acyl-CoA carboxylase<br>subunit beta                                        | <i>Streptomyces<br/>pseudogriseolus</i> | 100/100                            | WP_107481696                 |
| 19          | 265                  | hypothetical protein                                                        | <i>Streptomyces sp.</i><br>NRRL S-1314  | 100/100                            | WP_031018585                 |
| 20          | 83                   | hypothetical protein                                                        | <i>Streptomyces sp.</i><br>NRRL S-1314  | 100/100                            | WP_006130567                 |
| 21          | 748                  | TOMM precursor leader<br>peptide-binding protein                            | <i>Streptomyces sp.</i><br>NRRL S-1314  | 99/99                              | WP_031018582                 |
| 22          | 396                  | histidine kinase                                                            | <i>Streptomyces sp.</i><br>BK335        | 79/85                              | WP_133048867                 |
| 23          | 204                  | response regulator                                                          | <i>Streptomyces sp.</i><br>BK335        | 94/97                              | WP_133048866                 |
| 24          | 416                  | acyltransferase<br>domain-containing<br>protein                             | <i>Streptomyces sp.</i><br>BK335        | 79/85                              | WP_133048865                 |
| 25          | 587                  | fatty acyl-AMP ligase                                                       | <i>Streptomyces sp.</i><br>BK335        | 80/85                              | WP_133048864.                |
| 26          | 65                   | acyl-CoA carboxylase<br>subunit epsilon                                     | <i>Streptomyces sp.</i><br>BK335        | 72/78                              | WP_133048863                 |
| 27          | 217                  | hypothetical protein                                                        | <i>Streptomyces sp.</i><br>BK335        | 62/74                              | WP_133048862                 |
| 28          | 74                   | hypothetical protein                                                        | <i>Streptomyces sp.</i><br>BK335        | 61/68                              | WP_133048861                 |
| 29          | 582                  | acyl-CoA dehydrogenase                                                      | <i>Streptomyces sp.</i><br>NRRL S-1314  | 99/99                              | WP_037816785                 |
| 30          | 265                  | 4'-phosphopantetheinyl<br>transferase superfamily<br>protein                | <i>Streptomyces sp.</i><br>BK335        | 85/89                              | WP_133048909                 |
| 31          | 271                  | thioesterase                                                                | <i>Streptomyces<br/>gancidicus</i>      | 99/99                              | WP_052034335                 |

| <b>gene</b> | <b>Size<br/>(AA)</b> | <b>Proposed function</b>                      | <b>Protein homolog</b>                  | <b>Identity/<br/>Similarity(%)</b> | <b>Protein<br/>accession</b> |
|-------------|----------------------|-----------------------------------------------|-----------------------------------------|------------------------------------|------------------------------|
| 32          | 276                  | AfsR/SARP family<br>transcriptional regulator | <i>Streptomyces sp.</i><br>BK335        | 91/93                              | WP_133048857                 |
| 33          | 89                   | acyl carrier protein                          | <i>Streptomyces sp.</i><br>BK335        | 91/97                              | WP_133048856                 |
| 34          | 242                  | SDR family<br>oxidoreductase                  | <i>Streptomyces sp.</i><br>NRRL S-1314  | 99/99                              | WP_031018568                 |
| 35          | 131                  | SchA/CurD                                     | <i>Streptomyces sp.</i><br>BK335        | 85/92                              | WP_133048855                 |
| 36          | 153                  | DUF1772<br>domain-containing<br>protein       | <i>Streptomyces sp.</i><br>BK335        | 86/90                              | WP_133048854                 |
| 37          | 127                  | SchA/CurD                                     | <i>Streptomyces sp.</i><br>BK335        | 87/92                              | WP_133048853                 |
| 38          | 111                  | TcmI family type II<br>polyketide cyclase     | <i>Streptomyces sp.</i><br>BK335        | 85/94                              | WP_133048852                 |
| 39          | 144                  | cupin domain-containing<br>protein            | <i>Streptomyces sp.</i><br>BK335        | 87/95                              | WP_133048851                 |
| 40          | 429                  | beta-ketoacyl-ACP<br>synthase II              | <i>Streptomyces sp.</i><br>BK335        | 93/96                              | WP_133048850                 |
| 41          | 406                  | ketosynthase<br>chain-length factor           | <i>Streptomyces sp.</i><br>RV15         | 86/91                              | WP_067021572                 |
| 42          | 154                  | polyketide cyclase                            | <i>Streptomyces<br/>pseudogriseolus</i> | 100/100                            | WP_086681953                 |
| 43          | 153                  | putative membrane<br>protein                  | <i>Streptomyces sp.</i><br>BK335        | 90/94                              | TCS44129.1                   |
| 44          | 251                  | SDR family<br>oxidoreductase                  | <i>Streptomyces sp.</i><br>BK335        | 92/97                              | WP_133048847                 |
| 45          | 103                  | antibiotic biosynthesis<br>monooxygenase      | <i>Streptomyces sp.</i><br>BK335        | 83/88                              | WP_133048845                 |

| <b>gene</b> | <b>Size<br/>(AA)</b> | <b>Proposed function</b>                       | <b>Protein homolog</b>           | <b>Identity/<br/>Similarity(%)</b> | <b>Protein<br/>accession</b> |
|-------------|----------------------|------------------------------------------------|----------------------------------|------------------------------------|------------------------------|
| 46          | 288                  | NAD(P)-dependent<br>oxidoreductase             | <i>Streptomyces sp.</i><br>BK335 | 90/95                              | WP_133048844                 |
| 47          | 556                  | monooxygenase                                  | <i>Streptomyces sp.</i><br>BK335 | 82/88                              | WP_133048843                 |
| 48          | 113                  | antibiotic biosynthesis<br>monooxygenase       | <i>Streptomyces sp.</i><br>BK335 | 75/87                              | WP_133048842                 |
| 49          | 521                  | copper oxidase                                 | <i>Streptomyces sp.</i><br>BK335 | 81/87                              | WP_133048841                 |
| 50          | 618                  | asparagine synthase<br>(glutamine-hydrolyzing) | <i>Streptomyces sp.</i><br>BK335 | 92/94                              | WP_133048840                 |
| 51          | 539                  | monooxygenase                                  | <i>Streptomyces sp.</i><br>BK335 | 82/89                              | WP_133048839                 |
